# Supplementary material for: PD-L1 targeting and subclonal immune escape mediated by PD-L1 mutations in metastatic colorectal cancer
Source: PubMed Central journal article supplement — J Immunother Cancer. 2021 Jul 27;9(7):e002844. doi: 10.1136/jitc-2021-002844 (PMC8317124; doi:10.1136/jitc-2021-002844), 2021-07-27
Supplement: jitc-2021-002844supp001.pdf [file jitc-2021-002844supp001.pdf]

Supplementary Figure S1

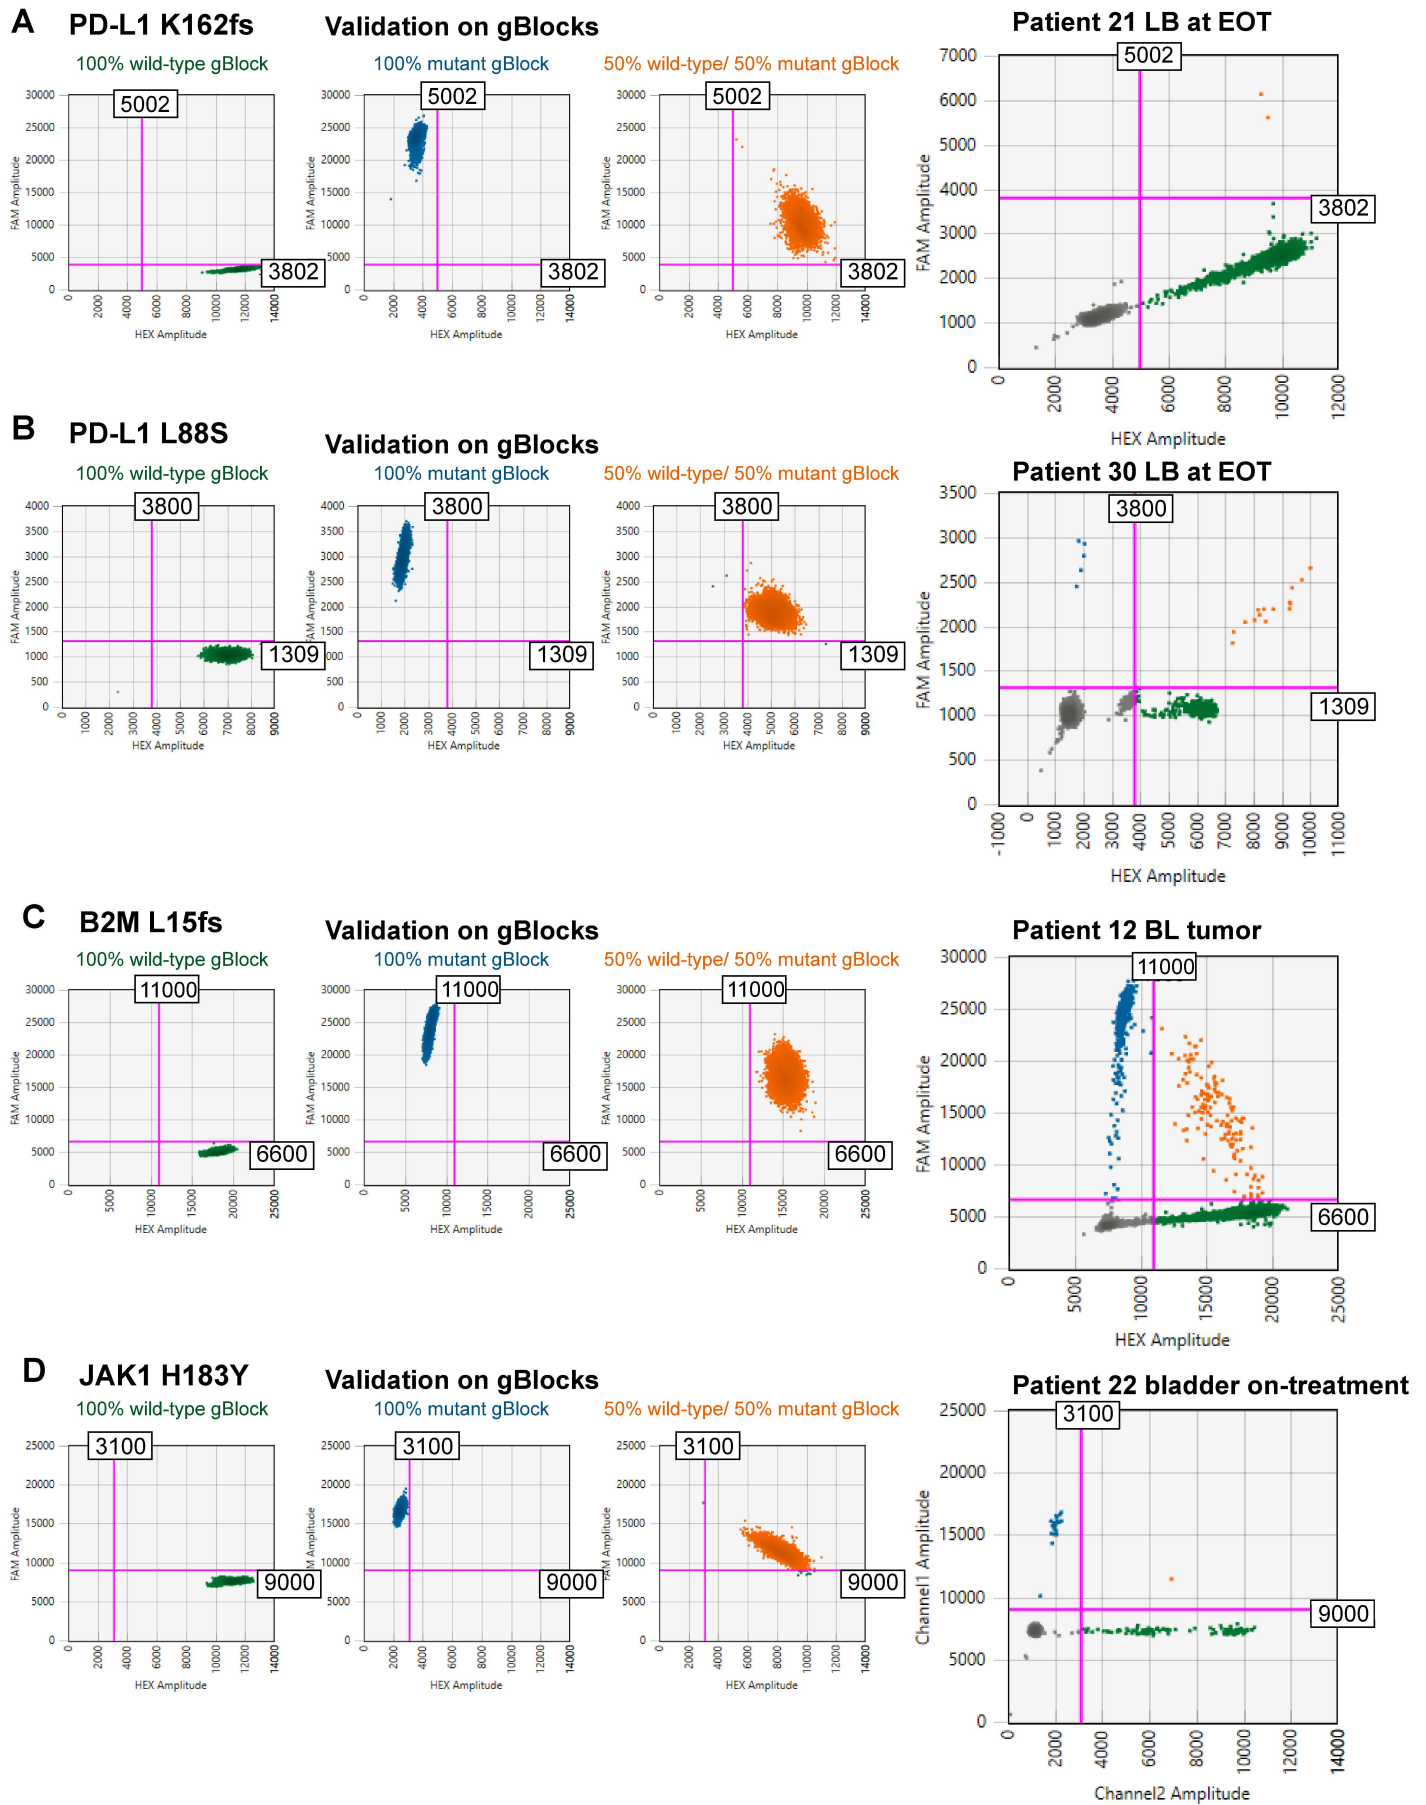

### Supplementary Figure S2

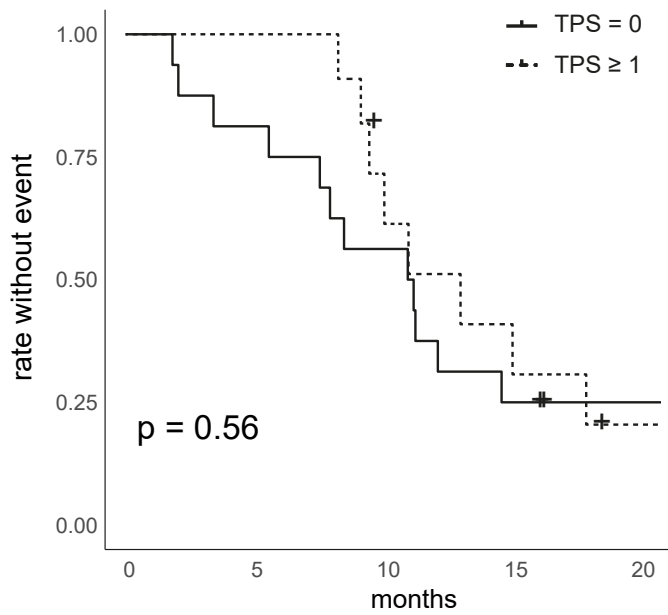

Number at risk

|       |        |    |    |    |    |
|-------|--------|----|----|----|----|
| —     | 16     | 13 | 9  | 4  | 2  |
| - - - | 11     | 11 | 7  | 4  | 1  |
|       | 0      | 5  | 10 | 15 | 20 |
|       | months |    |    |    |    |

### Supplementary Figure S3

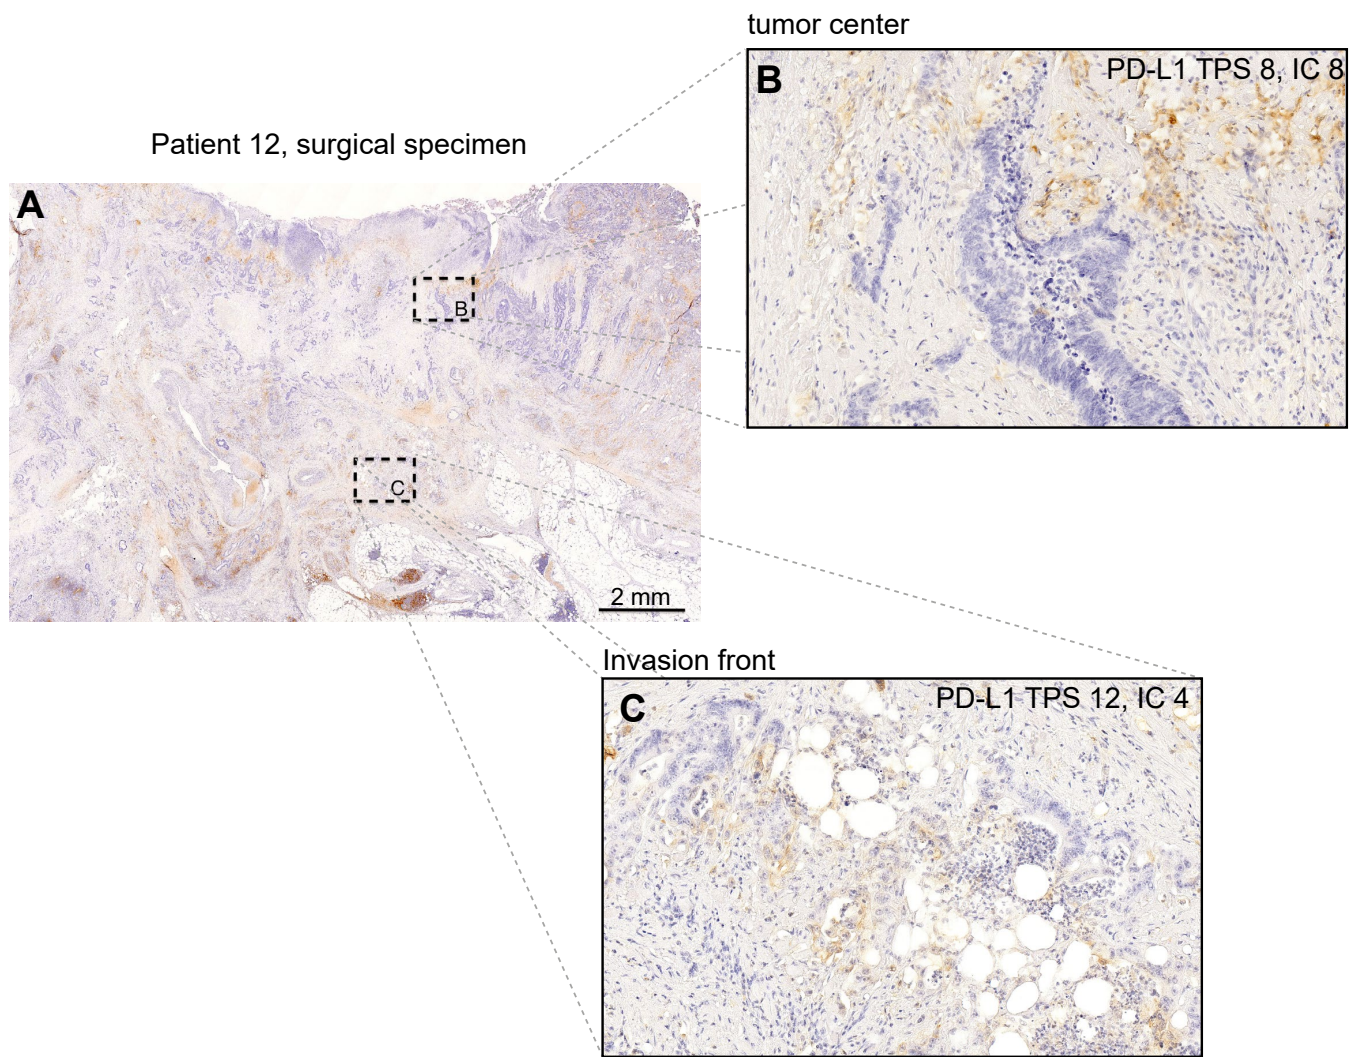

## Supplementary Figure S4

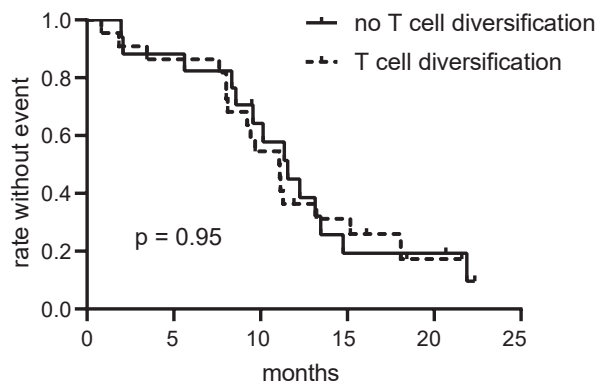

## Supplementary Figure S5

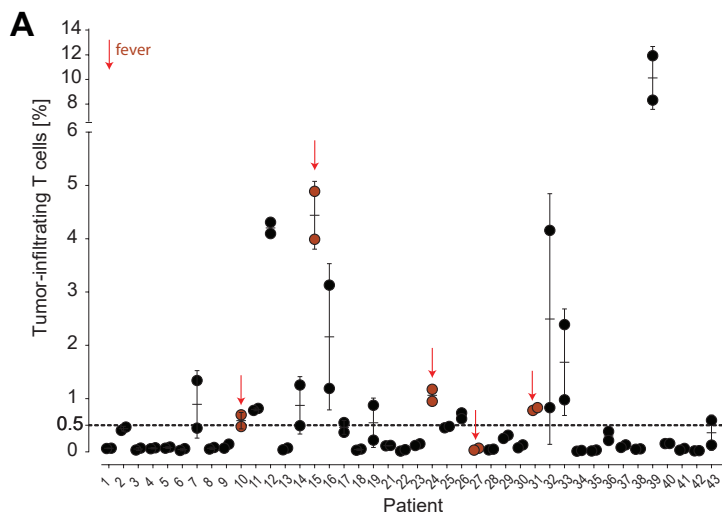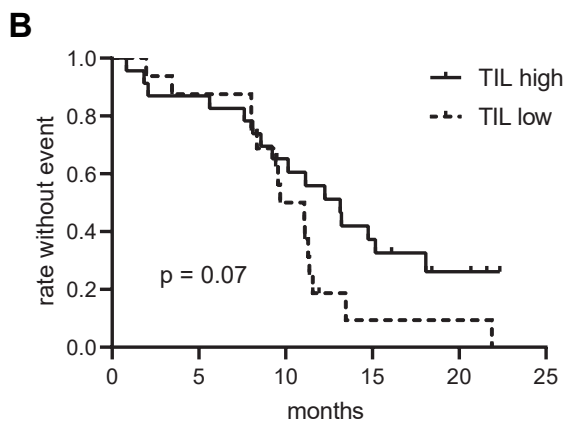

Supplementary Figure S6

**A**

Patient 7

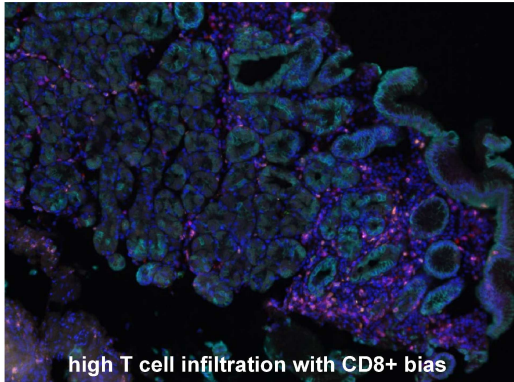

Patient 11

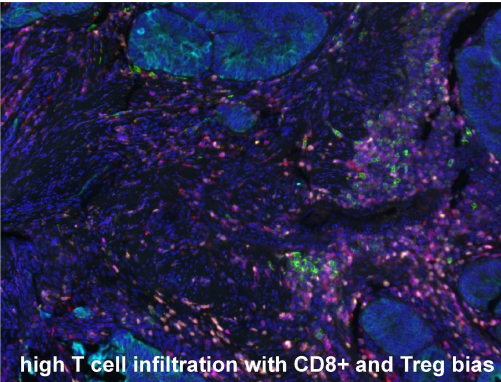

Patient 12

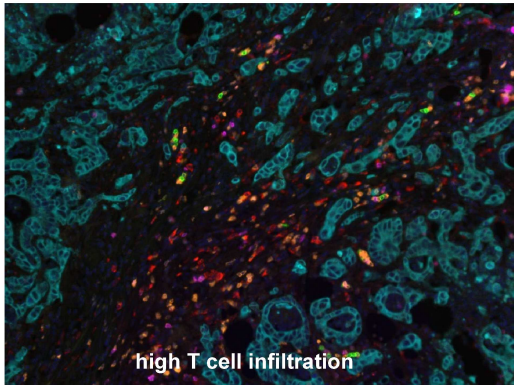

Patient 27

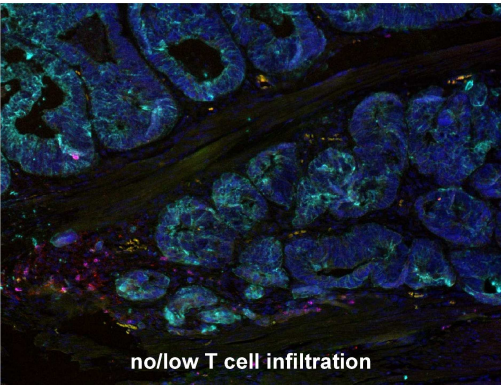

All nuclei Tumor Monocytes/Macrophages B cells T cells CD8+ T cells Treg cells

**B**

Patient 12

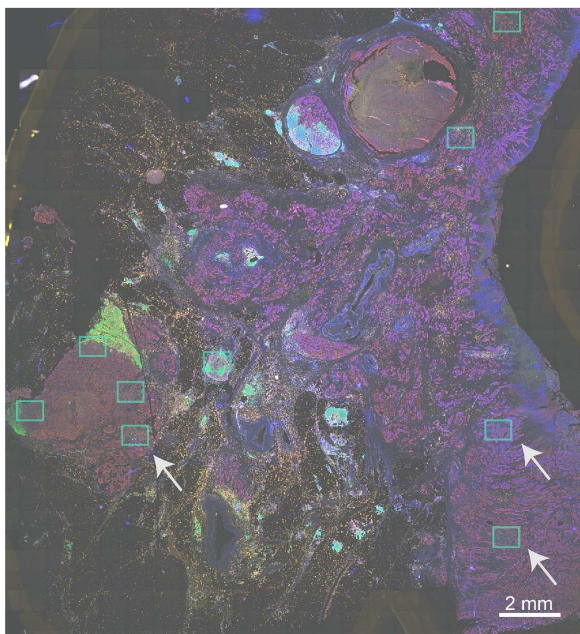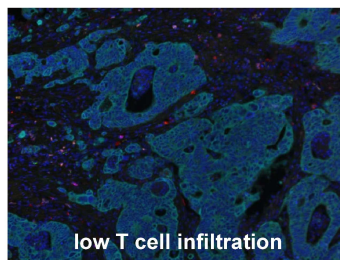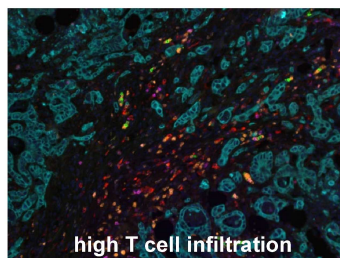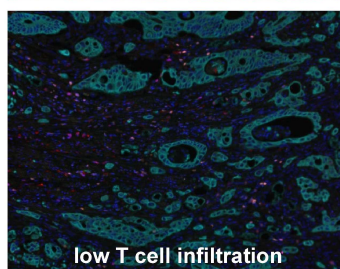

# Supplementary Figure S7

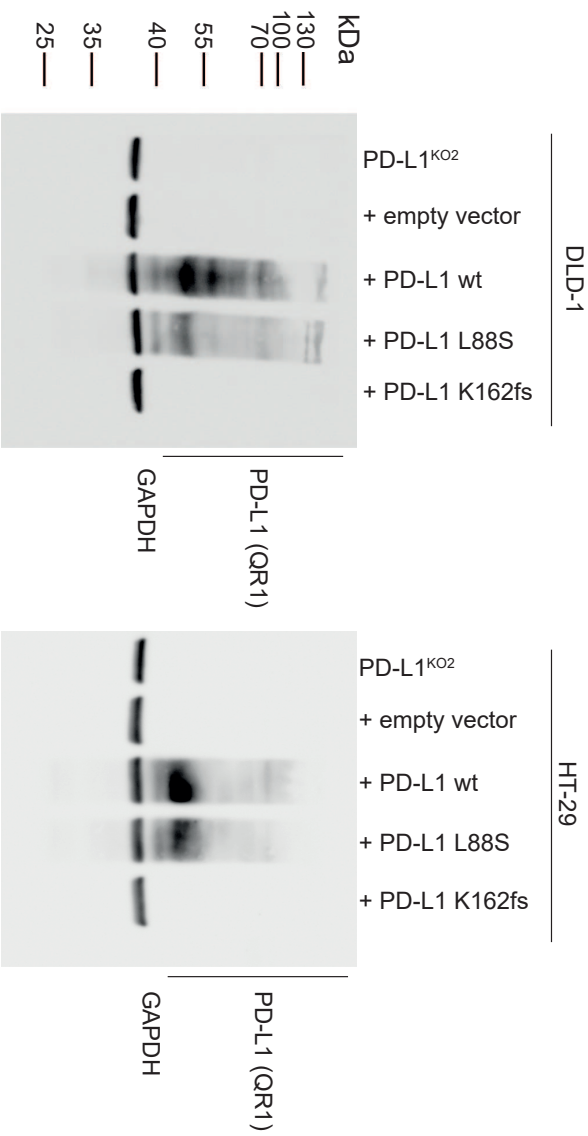

## Supplementary Figure S8

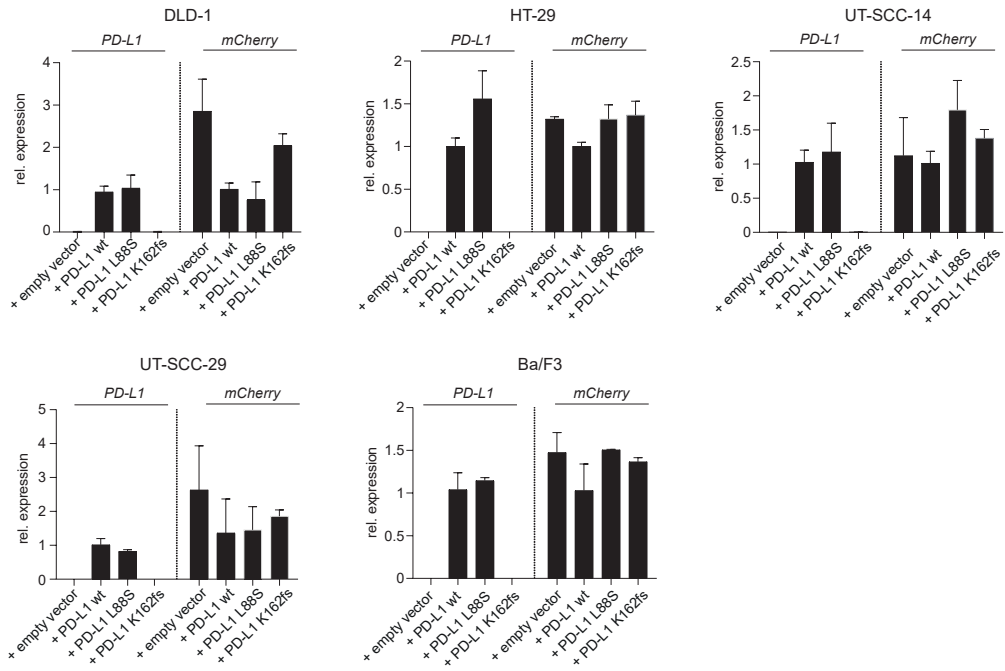

### Supplementary Figure S9

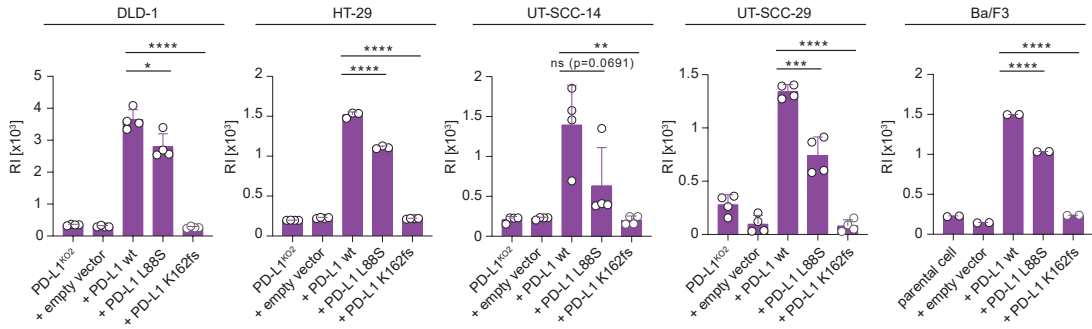

### Supplementary Figure S10

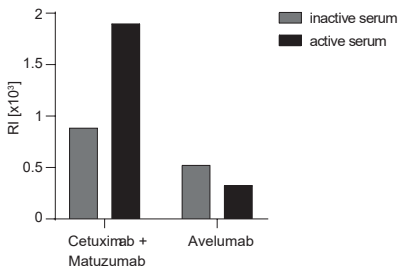

### Supplementary Figure S11

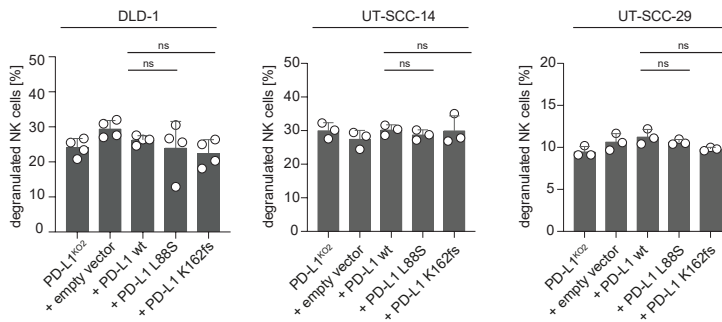



## Supplemental Figure S12

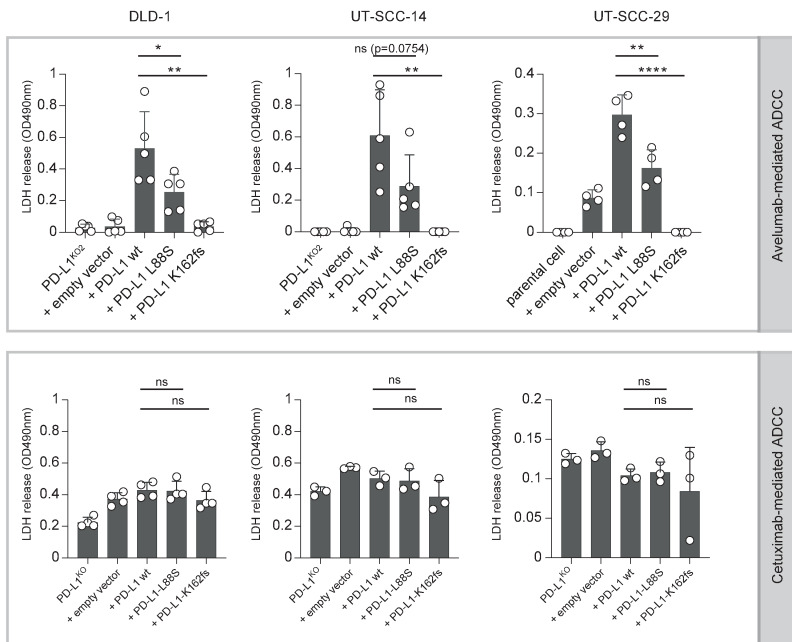

## Supplementary Figure S13

A

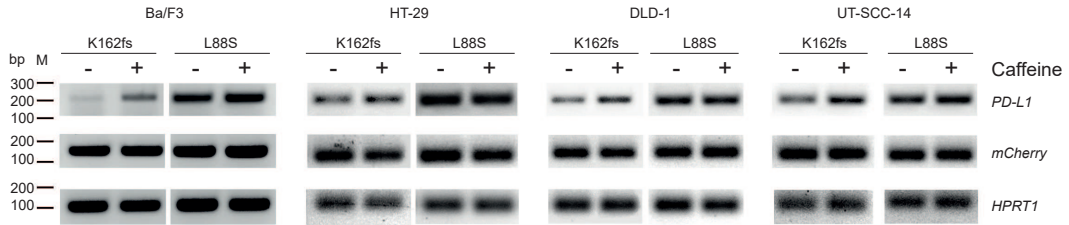

B

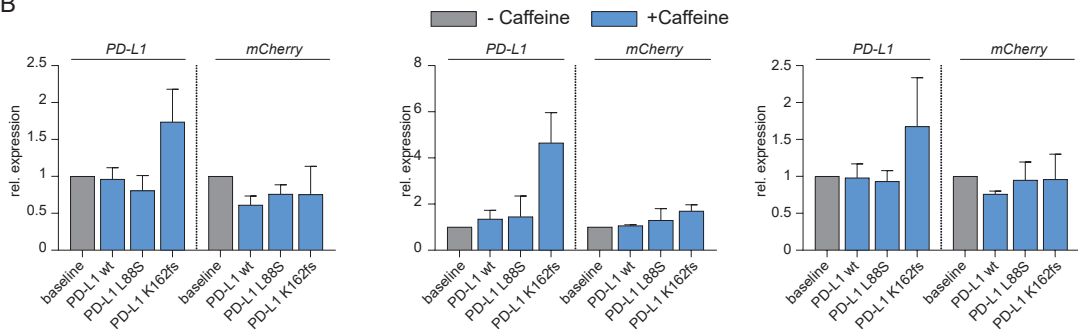

### Supplementary Figure Legends

**Fig. S1. Two-Dimensional plots for each ddPCR assay.** (A) PD-L1 K162fs, (B) PD-L1 L88S, (C) B2M L15fs and (D) JAK1 H183Y. X-axis: HEX amplitude, Y-axis: FAM amplitude. Pink lines with adjacent number indicate thresholds for discrimination of positive/negative droplets. Left: Each assay was validated on gBlocks with the wild type or mutant sequence. Right: representative 2D plot for patient with respective variant.

*BL, baseline; EOT, End of treatment; LB, liquid biopsy*

**Fig. S2. Tumor proportional score (TPS) and association with PFS.** Kaplan Meier plot of progression-free survival stratified by TPS = 0 or TPS  $\geq$  1. Statistical-test: Log-rank test.

**Fig. S3. Differences of PD-L1 positivity in tumor center vs. invasion front.** A, Overview with marked areas of **B**, tumor center (**B**) and **C**, invasion front (**C**). *IC, immune cell score; TPS, tumor proportional score*

**Fig. S4. Peripheral blood T cell diversification and association with PFS.** Kaplan Meier plot of progression-free survival according to changes in peripheral blood T cell Shannon diversity between baseline and week 4 of AVETUX regimen. Statistical-test: Log-rank test.

**Fig. S5. Tumor-infiltrating lymphocytes (TiL) quantification and association with PFS.** **A**, Levels of TiLs across cohort. Patients with fever after avelumab application are marked with red arrows. Measurements performed in duplicates. Error bars indicate mean  $\pm$ SD. **B**, Kaplan Meier plot of progression-free survival according to Tumor-infiltrating T cells. Statistical-test: Log-rank test.

**Fig. S6. Assessment of immune cell infiltration by multispectral imaging.** **A**, Representative stainings of four patients with heterogenous T cell infiltration levels ranging

from none/low infiltration to high/biased infiltration. B, Different areas of one tumor indicating intratumour heterogeneity of T cell infiltration.

**Fig. S7. Immunodetection of PD-L1 variants using the QR1 antibody clone.** Detection of PD-L1 protein levels using the QR1 antibody (Supplementary Table S3) after PAGE separation of whole cell extracts from PD-L1-KO DLD-1 and HT-29 cells ectopically re-expressing wt PD-L1 and the L88S and K162fs variants.

**Fig. S8. qRT-PCR analysis of *PD-L1* transcript abundancy in cell lines ectopically expressing *PD-L1* variants.** Cells transduced with indicated PD-L1 variants were subjected to qRT-PCR analysis to quantify *PD-L1* and *mCherry* transcript levels. The Ct values were normalized to *HPRT1* (*Hypoxanthine-guanine phosphorribosyltransferase*) and relative expression changes were calculated according to the  $\Delta\Delta C_t$  method.

**Fig. S9. Flow cytometric detection of PD-L1 surface expression on cell lines.** Flow cytometric detection of PD-L1 surface expression (n=2 for Ba/F3; n=3 for HT-29, n=4 for DLD-1, UT-SCC-14 and UT-SCC-29) displayed as the mean relative fluorescence intensity (RI) after staining with a FITC-labeled anti-PD-L1 antibody. Statistics: two-tailed unpaired t test. Asterisks indicate p-value range (\*p<0.05; \*\*p<0.01; \*\*\*p<0.001; \*\*\*\*p<0.0001; ns>0.05).

**Fig. S10. Complement-dependent cytotoxicity in cell expressing PD-L1 wild-type.** UT-SCC-14 cells were treated with avelumab and complement followed by PI staining. The combination of cetuximab and matuzumab was used as positive control.

**Fig. S11. Cetuximab-mediated ADCC in DLD-1, UT-SCC14 and UT-SCC-29 cells.** NK cell degranulation induced by co-culturing primary NK cells and DLD-1 (n=4), HT-29 (n=3) and UT-SCC-29 (n=3) cell lines expressing indicated *PD-L1* variants in the presence of

cetuximab. Percent degranulated NK cells normalized to spontaneous NK degranulation is shown for all co-cultures. Statistics: two-tailed unpaired t test. ns indicates p-values >0.05).

**Fig. S12. Quantitation of antibody-dependent cytotoxicity in UT-SCC-29, UT-SCC-14 and DLD-1 cells expressing *PD-L1* variants.** Colorimetric quantitation of lactate dehydrogenase (LDH) release from cell lines (n=3-5) expressing indicated *PD-L1* variants after co-culturing them with primary NK cells in the presence of avelumab. Detected LDH levels were normalized to spontaneous LDH release. Statistics: two-tailed unpaired t test. Asterisks indicate p-value range (\*p<0.05; \*\*p<0.01; \*\*\*p<0.001; \*\*\*\*p<0.0001; ns>0.05).

**Fig. 13. PD-L1 K162fs is degraded via nonsense-mediated mRNA decay (NMD).** Inhibition of NMD in PD-L1 wt, L88S and PD-L1 K162fs transduced Ba/F3, HT-29, DLD-1 and UT-SCC-14 cells using 20 mM caffeine for 4 h leads to a selective enrichment of PD-L1-K162fs transcript as detected by semiquantitative RT-PCR (A) and qRT-PCR (B). For qRT-PCR, Ct values were normalized to *HPRT1* (*Hypoxanthine-guanine phosphoribosyltransferase*) and relative expression changes were calculated according to the  $\Delta\Delta C_t$  method. mCherry: lentiviral transduction marker

Supplementary Table S1. Applied Antibodies.

| Target                                         | Epitope     | Host   | Isotype                 | Clone       | Label       | Working dilution | Supplier                  | Cat. No.      | Used for |
|------------------------------------------------|-------------|--------|-------------------------|-------------|-------------|------------------|---------------------------|---------------|----------|
| PD-L1                                          | 19-239      | goat   | polyclonal IgG          |             | none        | 1:1000           | R&D Systems               | AF156         | WB       |
| PD-L1                                          | C-term      | rabbit | monoclonal IgG          | E1L3N       | non         | 1:1999           | Cell Signaling            | #13684        | WB       |
| PD-L1                                          | full length | mouse  | monoclonal IgG1         | MIH2        | FITC        | 1:300            | Thermo Fisher             | MA5-16841     | FC       |
| CD56                                           |             | mouse  | IgG1                    | N901        | PE          | 1:20             | Beckman Coulter           | A07788        | FC       |
| CD107a                                         |             | mouse  | IgG1, kappa             | H4A3        | PE/Cy7      | 1:100            | BioLegend                 | 328618        | FC       |
| CD3                                            |             | mouse  | IgG1                    | UCHT1       | FITC        | 1:20             | Beckman Coulter           | A07746        | FC       |
| CD3                                            |             | mouse  | monoclonal IgG2a, kappa | OKT3        | none        | 100 ng/ml        | BioLegend                 | 317326        | TA       |
| CD28                                           |             | mouse  | monoclonal IgG1, kappa  | CD28.2      | none        | 100 ng/ml        | BioLegend                 | 302902        | TA       |
| p65                                            | 1-286       | mouse  | monoclonal IgG1         |             | none        | 1:200            | Santa Cruz                | sc-8008       | WB       |
| PHB1                                           | full length | mouse  | monoclonal IgG2a, kappa |             | none        | 1 µg/ml          | Abnova                    | H00005245-M01 | WB       |
| PHB2                                           | 220-299     | mouse  | monoclonal IgG1         |             | none        | 1:200            | Santa Cruz                | sc-133094     | WB       |
| GAPDH                                          | full length | mouse  | monoclonal IgG1         | 6C5         | none        | 1:200            | Santa Cruz                | sc-32233      | WB       |
| mouse-IgG (IgG1, IgG2a, IgG2b, IgG3)           |             | goat   |                         |             | HRP         | 1:1000           | R&D                       | HAF007        | WB       |
| rabbit-IgG                                     |             | goat   |                         |             | HRP         | 1:10000          | Sigma-Aldrich             | A6154         | WB       |
| goat-IgG (IgG1, IgG2a, IgG2b, IgG3, IgG4)      |             | mouse  |                         |             | HRP         | 1:5000           | Santa Cruz                | sc-2354       | WB       |
| mouse-IgG (IgG1, IgG2a, IgG2b, IgG3, IgM, IgA) |             | goat   |                         |             | IRDye 800CW | 1:1000           | Li-Cor                    | 926-32210     | WB       |
| rabbit-IgG                                     |             | goat   |                         |             | IRDye 680RD | 1:1000           | Li-Cor                    | 926-68071     | WB       |
| human-IgG                                      |             | rabbit |                         |             | FITC        | 1:1000           | Sigma-Aldrich             | F4512         | FC       |
| PanCK                                          |             | mouse  |                         | AE1/AE3+5D3 | none        | 1:50             | Zytomed                   | MSG098        | IHC      |
| CD3                                            | 156-168     | rabbit | IgG                     | SP7         | none        | 1:50             | Labvision (Thermo Fisher) | RM-9107       | IHC      |
| CD16                                           |             | mouse  | IgG2a                   | 2H7         | none        | 1:80             | Leica                     | NCL-L-CD16    | IHC      |
| CD56                                           |             | rabbit | IgG1                    | MRQ-42      | none        | 1:250            | Cell marque               | 156R-96       | IHC      |
| PD-L1                                          |             | rabbit | IgG                     | QR1         | none        | 1:100/1:1000     | Quartett                  | 1-PR292-02    | IHC/WB   |
| PD-L1                                          |             | rabbit | IgG                     | CAL10       | none        | 1:200            | Zytomed                   | RBG063        | IHC      |
| CD3                                            |             | rabbit | IgG                     | SP7         | None        | 1:100            | Thermo Fisher             | MA5-14524     | MI       |
| CD8                                            |             | rabbit |                         | SP16        | None        | 1:100            | Abcam                     | ab101500      | MI       |
| CD20                                           |             | mouse  |                         | L26         | None        | 1:400            | Dako                      | M0755         | MI       |
| CD163                                          |             | mouse  |                         | MRQ-26      | None        | 1:50             | Cell Marque               | MRQ-26        | MI       |
| Foxp3                                          |             | mouse  |                         | 236A/E7     | None        | 1:200            | Abcam                     | ab20034       | MI       |
| panCK                                          |             | mouse  |                         | AE1/AE3     | none        | 1:100            | Dako                      | M3515         | MI       |

WB, western blot; FC, flow cytometry; TA, T cell activation; IHC, immunohistochemistry; MI, multispectral imaging

**Supplementary Table S2.** Sequenced genes and gene regions.

| <b>Gene</b>   | <b>Target Region</b>                               |
|---------------|----------------------------------------------------|
| <i>AKT1</i>   | codons 10-30                                       |
| <i>APC</i>    | codons 789 - 1589                                  |
| <i>B2M</i>    | entire coding region                               |
| <i>BRAF</i>   | codons 582-605                                     |
| <i>CTNNB1</i> | codons 30-46                                       |
| <i>EGFR</i>   | exon 12,13,18,19,20,21                             |
| <i>ERBB3</i>  | codons 85-105                                      |
| <i>FCGR3A</i> | codon 158                                          |
| <i>FCGR2A</i> | codon 131                                          |
| <i>HRAS</i>   | codons 10-15                                       |
| <i>JAK1</i>   | entire coding region                               |
| <i>JAK2</i>   | entire coding region                               |
| <i>KRAS</i>   | codons 10-15, 51-63, 98-150                        |
| <i>NRAS</i>   | codons 10-15, 51-63                                |
| <i>PIK3CA</i> | codons 64-94, 316-346, 418-434, 527-560, 1002-1054 |
| <i>PD-L1</i>  | entire coding region                               |
| <i>PTEN</i>   | codons 71-124,130,173,267,268,320                  |
| <i>SMAD4</i>  | entire coding region                               |
| <i>TP53</i>   | entire coding region                               |

Supplementary Table S3. Overview of all variants found by gene panels sequencing in all tissues and timepoints.

**Table is provided as excel sheet.**



**Supplementary Table S4.** ddPCR primer and probe sequences.

| Assay           |           |        | Sequence 5' to 3'       | 5' Reporter dye |
|-----------------|-----------|--------|-------------------------|-----------------|
| PD-L1<br>L88S   | forward   | primer | CTGAAGGTTTCAGCATAGTAGC  |                 |
|                 | reverse   | primer | TGCATCCTGCAATTTACAT     |                 |
|                 | wild-type | probe  | CT+ACC+C+C+AAGGC        | HEX             |
|                 | mutant    | probe  | CT+A+CC+C+A+AG+GC       | FAM             |
| PD-L1<br>K162fs | forward   | primer | ACCTCTGAACATGAACTGACAT  |                 |
|                 | reverse   | primer | CTCCTCTCTCTTGAATTGGT    |                 |
|                 | wild-type | probe  | CTG+T+T+GA+AG+G+AC      | HEX             |
|                 | mutant    | probe  | CTG+T+C+GA+AG+GAC       | FAM             |
| JAK1<br>H183Y   | forward   | primer | TCTTCTTCATCATGGCATAGTGT |                 |
|                 | reverse   | primer | GGTGAAATGCCTGGCTC       |                 |
|                 | wild-type | probe  | TCA+T+G+TC+CA+TCCT      | HEX             |
|                 | mutant    | probe  | TCA+T+A+TC+CAT+C+CT     | FAM             |
| B2M<br>L15fs    | forward   | primer | GGCATTCTGAAGCTGAC       |                 |
|                 | reverse   | primer | GAGAGACTCACGCTGGATA     |                 |
|                 | wild-type | probe  | CTA+CT+CTC+T+C+TTT+CT   | HEX             |
|                 | mutant    | probe  | CTA+CT+CTC+T+T+TCT+GG   | FAM             |

Base after “+” is a locked nucleic acid base.

**Supplementary Table S5.** TPS and IC score with two different PD-L1 Antibody clones.

| Pat ID | TPS(%) QR1 | IC(%) QR1 | TPS(%) CAL10 | IC (%) CAL10 | origin tumor sample   | material type     |
|--------|------------|-----------|--------------|--------------|-----------------------|-------------------|
| 1      | 0          | 30        |              |              |                       | surgical specimen |
| 2      | 0          | 40        |              |              |                       | surgical specimen |
| 3      | 0          | 50        |              |              |                       | surgical specimen |
| 4      | 0          | 2         |              |              |                       | biopsy            |
| 5      | 0          | 15        |              |              |                       | surgical specimen |
| 6      | 1          | 25        |              |              |                       | surgical specimen |
| 7      | n.e.       | n.e.      |              |              |                       | biopsy            |
| 8      | 0          | 7         | 0            | 5            | liver metastasis      | surgical specimen |
| 9      | 25         | 30        |              |              |                       | biopsy            |
| 10     | n.e.       | n.e.      |              |              |                       | surgical specimen |
| 11     | 0          | 20        | 0            | 15           |                       | biopsy            |
| 12     | 4          | 40        | 4            | 35           |                       | surgical specimen |
| 13     | 2          | 20        |              |              |                       | biopsy            |
| 14     | n.e.       | n.e.      |              |              |                       | surgical specimen |
| 15     | 1          | 10        |              |              |                       | surgical specimen |
| 16     | 1          | 20        |              |              |                       | surgical specimen |
| 17     | 0          | 3         | 0            | 0            |                       | surgical specimen |
| 18     | n.e.       | n.e.      |              |              |                       | surgical specimen |
| 19     | n.e.       | n.e.      |              |              |                       | surgical specimen |
| 20     | 1          | 6         |              |              |                       | biopsy            |
| 21     | 3          | 20        |              |              |                       | biopsy            |
| 22     | 10         | 0         | 8            | 0            | bladder metastasis    | surgical specimen |
| 23     | n.e.       | n.e.      |              |              |                       | surgical specimen |
| 24     | 5          | 10        | 1            | 6            |                       | biopsy            |
| 25     | 0          | 1         | 0            | 5            |                       | surgical specimen |
| 26     | 0          | 0         |              |              |                       | biopsy            |
| 27     | 0          | 1         | 0            | 0            |                       | surgical specimen |
| 28     | 2          | 5         | 0            | 1            | lymph node metastasis | surgical specimen |
| 29     | 0          | 30        | 0            | 15           |                       | biopsy            |
| 30     | 0          | 10        | 0            | 5            | lymph node metastasis | surgical specimen |
| 31     | n.e.       | n.e.      |              |              |                       | biopsy            |
| 32     | 0          | 3         | 0            | 3            | lung metastasis       | surgical specimen |
| 33     | n.e.       | n.e.      |              |              |                       |                   |
| 34     | n.e.       | n.e.      |              |              |                       |                   |
| 35     | 0          | 1         | 0            | 1            |                       | biopsy            |
| 36     | n.e.       | n.e.      |              |              |                       | surgical specimen |
| 37     | n.e.       | n.e.      |              |              |                       | surgical specimen |
| 38     | n.e.       | n.e.      |              |              |                       |                   |
| 39     | n.e.       | n.e.      |              |              |                       | surgical specimen |
| 40     | 0          | 15        |              |              |                       | surgical specimen |
| 41     | 5          | 60        |              |              |                       | surgical specimen |
| 42     | 2          | 35        |              |              |                       | surgical specimen |
| 43     | 2          | 20        |              |              |                       | biopsy            |

IC, immune cell score; i.e., intraepithelial; if, invasion front; tc, tumor center; n.e., not eligible;

TPS, tumor proportional score

**Supplementary Table S6.** Validation of resistance variants detected by NGS with ddPCR.\*

| Patient            | <b>12</b>        |       |                             |       | <b>21</b>                  |       | <b>30</b>            |       |                             |       |                            |       |                   |       |                             |       |
|--------------------|------------------|-------|-----------------------------|-------|----------------------------|-------|----------------------|-------|-----------------------------|-------|----------------------------|-------|-------------------|-------|-----------------------------|-------|
| Mutation           | <b>B2M L15fs</b> |       |                             |       | <b>PD-L1 K162fs</b>        |       | <b>PD-L1 L88S</b>    |       |                             |       |                            |       |                   |       |                             |       |
| Timepoint/Material | BL tumor         |       | On-treatment tumor          |       | Liquid Biopsy at EOT       |       | Liquid Biopsy at EOT |       |                             |       |                            |       |                   |       |                             |       |
| detection method   | NGS              | ddPCR | NGS                         | ddPCR | NGS                        | ddPCR | NGS                  | ddPCR |                             |       |                            |       |                   |       |                             |       |
| VAF in [%]         | 7                | 7.02  | 0.89                        | 0.85  | 3.1                        | 0.06  | 2.7                  | 5.25  |                             |       |                            |       |                   |       |                             |       |
| Patient            | <b>22</b>        |       |                             |       |                            |       |                      |       |                             |       |                            |       |                   |       |                             |       |
| Mutation           | <b>B2M L15fs</b> |       |                             |       |                            |       | <b>PD-L1 L88S</b>    |       |                             |       |                            |       | <b>JAK1 H183Y</b> |       |                             |       |
| Timepoint/Material | BL tumor         |       | On-treatment bladder sample |       | On-treatment rectum sample |       | BL tumor             |       | On-treatment bladder sample |       | On-treatment rectum sample |       | BL tumor          |       | On-treatment bladder sample |       |
| detection method   | NGS              | ddPCR | NGS                         | ddPCR | NGS                        | ddPCR | NGS                  | ddPCR | NGS                         | ddPCR | NGS                        | ddPCR | NGS               | ddPCR | NGS                         | ddPCR |
| VAF in [%]         | 0                | 0.38  | 31                          | 34.1  | 31                         | 37.2  | 0                    | 0.09  | 43                          | 29.1  | 11.8                       | 27.7  | 0                 | 0.19  | 11                          | 14.9  |

\* The specificity of each mutant probe was validated on gBlocks with wild-type or mutant sequence.

**Supplementary Table S7.** Genetic information and variant allele frequencies on FCGR2A and FCGR3A SNPs.

| Pat ID | Gene   | Chrom | pos       | HGVS.p      | HGVS.c   | ID        | REF | ALT | DP     | UMT  | VMF  |
|--------|--------|-------|-----------|-------------|----------|-----------|-----|-----|--------|------|------|
| 1      | FCGR2A | chr1  | 161479745 | p.His167Arg | c.500A>G | rs1801274 | A   | G   | 94026  | 594  | 1.00 |
| 2      | FCGR2A | chr1  | 161479745 | p.His167Arg | c.500A>G | rs1801274 | A   | G   | 62765  | 362  | 0.49 |
| 3      | FCGR2A | chr1  | 161479745 | p.His167Arg | c.500A>G | rs1801274 | A   | G   | 24876  | 872  | 1.00 |
| 4      | FCGR2A | chr1  | 161479745 | p.His167Arg | c.500A>G | rs1801274 | A   | G   | 18015  | 1583 | 0.50 |
| 5      | FCGR2A | chr1  | 161479745 | p.His167Arg | c.500A>G | rs1801274 | A   | G   | 12236  | 857  | 0.56 |
| 6      | FCGR2A | chr1  | 161479745 | p.His167Arg | c.500A>G | rs1801274 | A   | G   | 79943  | 1662 | 0.48 |
| 8      | FCGR2A | chr1  | 161479745 | p.His167Arg | c.500A>G | rs1801274 | A   | G   | 8012   | 1738 | 0.50 |
| 12     | FCGR2A | chr1  | 161479745 | p.His167Arg | c.500A>G | rs1801274 | A   | G   | 45626  | 2737 | 0.55 |
| 15     | FCGR2A | chr1  | 161479745 | p.His167Arg | c.500A>G | rs1801274 | A   | G   | 16268  | 560  | 0.48 |
| 16     | FCGR2A | chr1  | 161479745 | p.His167Arg | c.500A>G | rs1801274 | A   | G   | 17675  | 227  | 0.42 |
| 17     | FCGR2A | chr1  | 161479745 | p.His167Arg | c.500A>G | rs1801274 | A   | G   | 21035  | 1516 | 0.50 |
| 18     | FCGR2A | chr1  | 161479745 | p.His167Arg | c.500A>G | rs1801274 | A   | G   | 30057  | 1488 | 1.00 |
| 20     | FCGR2A | chr1  | 161479745 | p.His167Arg | c.500A>G | rs1801274 | A   | G   | 25249  | 652  | 0.50 |
| 21     | FCGR2A | chr1  | 161479745 | p.His167Arg | c.500A>G | rs1801274 | A   | G   | 62650  | 1400 | 0.47 |
| 22     | FCGR2A | chr1  | 161479745 | p.His167Arg | c.500A>G | rs1801274 | A   | G   | 27465  | 1929 | 0.61 |
| 23     | FCGR2A | chr1  | 161479745 | p.His167Arg | c.500A>G | rs1801274 | A   | G   | 19039  | 352  | 0.49 |
| 24     | FCGR2A | chr1  | 161479745 | p.His167Arg | c.500A>G | rs1801274 | A   | G   | 106828 | 701  | 0.59 |
| 25     | FCGR2A | chr1  | 161479745 | p.His167Arg | c.500A>G | rs1801274 | A   | G   | 26199  | 1384 | 0.52 |
| 26     | FCGR2A | chr1  | 161479745 | p.His167Arg | c.500A>G | rs1801274 | A   | G   | 25859  | 1993 | 0.49 |
| 27     | FCGR2A | chr1  | 161479745 | p.His167Arg | c.500A>G | rs1801274 | A   | G   | 94129  | 900  | 0.50 |
| 29     | FCGR2A | chr1  | 161479745 | p.His167Arg | c.500A>G | rs1801274 | A   | G   | 39474  | 2014 | 0.49 |
| 31     | FCGR2A | chr1  | 161479745 | p.His167Arg | c.500A>G | rs1801274 | A   | G   | 33376  | 1611 | 0.48 |
| 32     | FCGR2A | chr1  | 161479745 | p.His167Arg | c.500A>G | rs1801274 | A   | G   | 20842  | 172  | 0.51 |
| 33     | FCGR2A | chr1  | 161479745 | p.His167Arg | c.500A>G | rs1801274 | A   | G   | 24262  | 324  | 1.00 |
| 34     | FCGR2A | chr1  | 161479745 | p.His167Arg | c.500A>G | rs1801274 | A   | G   | 25388  | 282  | 1.00 |
| 35     | FCGR2A | chr1  | 161479745 | p.His167Arg | c.500A>G | rs1801274 | A   | G   | 22444  | 288  | 0.99 |
| 36     | FCGR2A | chr1  | 161479745 | p.His167Arg | c.500A>G | rs1801274 | A   | G   | 64916  | 302  | 0.48 |
| 37     | FCGR2A | chr1  | 161479745 | p.His167Arg | c.500A>G | rs1801274 | A   | G   | 1336   | 146  | 0.58 |
| 38     | FCGR2A | chr1  | 161479745 | p.His167Arg | c.500A>G | rs1801274 | A   | G   | 92058  | 1331 | 0.53 |
| 39     | FCGR2A | chr1  | 161479745 | p.His167Arg | c.500A>G | rs1801274 | A   | G   | 20842  | 172  | 0.51 |
| 40     | FCGR2A | chr1  | 161479745 | p.His167Arg | c.500A>G | rs1801274 | A   | G   | 39480  | 2929 | 0.51 |
| 41     | FCGR2A | chr1  | 161479745 | p.His167Arg | c.500A>G | rs1801274 | A   | G   | 24937  | 2279 | 0.50 |
| 42     | FCGR2A | chr1  | 161479745 | p.His167Arg | c.500A>G | rs1801274 | A   | G   | 23600  | 1787 | 0.50 |
| 43     | FCGR2A | chr1  | 161479745 | p.His167Arg | c.500A>G | rs1801274 | A   | G   | 2172   | 61   | 0.46 |
| 5      | FCGR3A | chr1  | 161514542 | p.Phe212Val | c.634T>G | rs396991  | A   | C   | 15587  | 761  | 0.42 |
| 7      | FCGR3A | chr1  | 161514542 | p.Phe212Val | c.634T>G | rs396991  | A   | C   | 8385   | 887  | 0.45 |
| 8      | FCGR3A | chr1  | 161514542 | p.Phe212Val | c.634T>G | rs396991  | A   | C   | 6253   | 577  | 0.43 |
| 11     | FCGR3A | chr1  | 161514542 | p.Phe212Val | c.634T>G | rs396991  | A   | C   | 3409   | 15   | 0.55 |
| 13     | FCGR3A | chr1  | 161514542 | p.Phe212Val | c.634T>G | rs396991  | A   | C   | 23904  | 962  | 0.43 |
| 19     | FCGR3A | chr1  | 161514542 | p.Phe212Val | c.634T>G | rs396991  | A   | C   | 3948   | 82   | 0.52 |
| 21     | FCGR3A | chr1  | 161514542 | p.Phe212Val | c.634T>G | rs396991  | A   | C   | 22966  | 213  | 1.00 |
| 22     | FCGR3A | chr1  | 161514542 | p.Phe212Val | c.634T>G | rs396991  | A   | C   | 17670  | 264  | 1.00 |
| 24     | FCGR3A | chr1  | 161514542 | p.Phe212Val | c.634T>G | rs396991  | A   | C   | 11871  | 143  | 0.41 |
| 29     | FCGR3A | chr1  | 161514542 | p.Phe212Val | c.634T>G | rs396991  | A   | C   | 13284  | 552  | 0.45 |

---

|    |        |      |           |             |          |          |   |   |       |     |      |
|----|--------|------|-----------|-------------|----------|----------|---|---|-------|-----|------|
| 30 | FCGR3A | chr1 | 161514542 | p.Phe212Val | c.634T>G | rs396991 | A | C | 29396 | 818 | 0.43 |
| 31 | FCGR3A | chr1 | 161514542 | p.Phe212Val | c.634T>G | rs396991 | A | C | 31359 | 975 | 0.46 |
| 40 | FCGR3A | chr1 | 161514542 | p.Phe212Val | c.634T>G | rs396991 | A | C | 19519 | 456 | 0.19 |
